# Supplementary material for: The efficient removal of diclofenac sodium and bromocresol green from aqueous solution by sea urchin-like Ni/Co-BTC bimetallic organic framework: adsorption isotherms, kinetics and mechanisms
Source: Royal Society of Chemistry journal article supplement (doi:10.1039/d2nj03134e), 2022-01-01
Supplement: d2nj03134e1.pdf [file d2nj03134e1.pdf]

**The efficient removal of diclofenac sodium and bromocresol green  
from aqueous solution by sea urchin-like Ni/Co-BTC bimetallic  
organic framework: adsorption isotherms, kinetics and mechanism**

Jia Wang,<sup>a</sup> Yue Su,<sup>a</sup> Shi-Wen Lv<sup>b</sup> and Li-Hui Sun<sup>\*a</sup>

<sup>a</sup> *School of Ocean Science and Technology, Dalian University of Technology, Panjin,  
Liaoning 124221, PR China*

<sup>b</sup> *School of Environmental Science and Engineering, Zhejiang Gongshang University,  
Hangzhou, Zhejiang 310018, PR China*

---

\*Corresponding author.

Mailing address: School of Ocean Science and Technology, Dalian University of  
Technology, Panjin, Liaoning 124221, PR China

E-mail: sunlihui@dlut.edu.cn

Tel: +86-427-2631780

Fax: +86-427-2631798

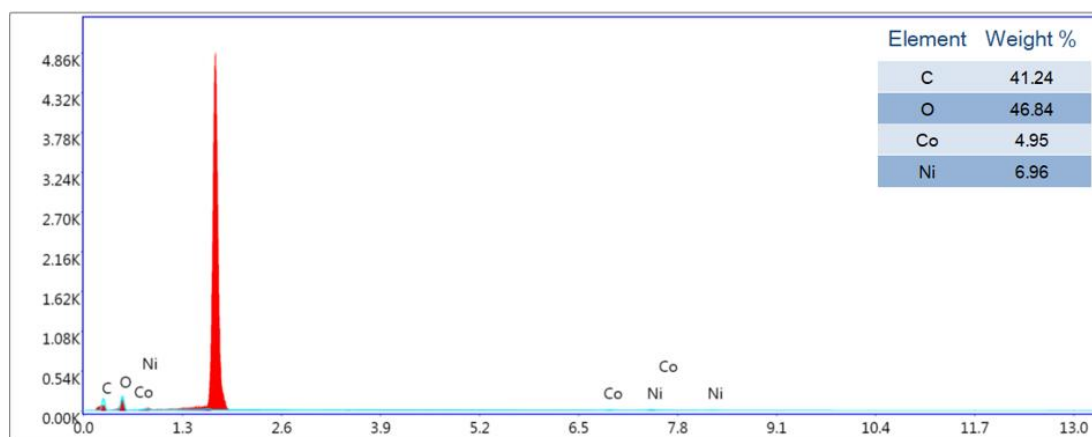

Fig. S1 EDX spectra of Ni/Co-BTC MOF.

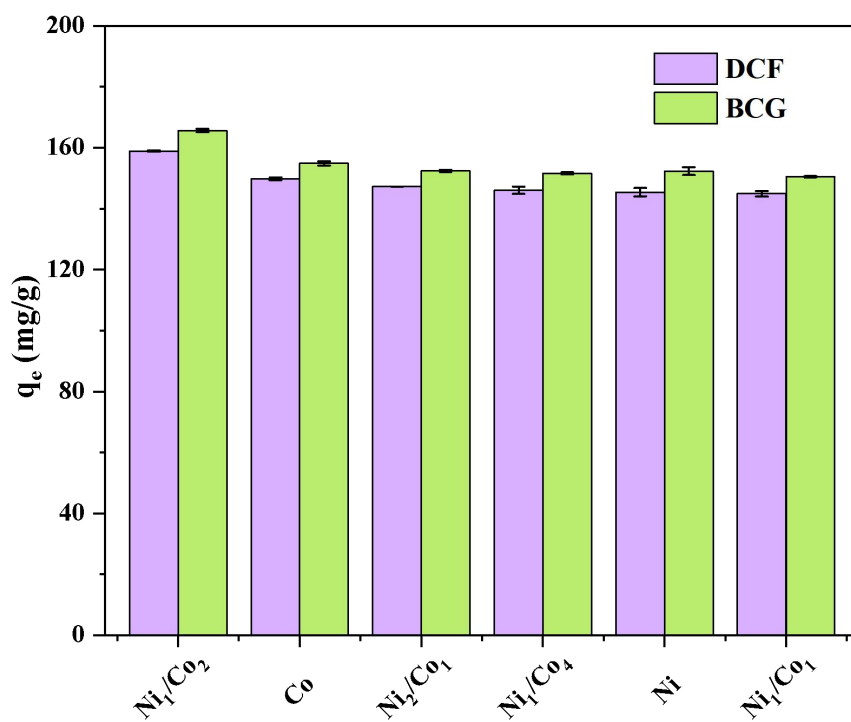

Fig. S2 Effect of Ni/Co molar ratio on adsorption of DCF and BCG on Ni/Co-BTC MOF.

Reaction conditions: DCF and BCG concentration = 100 mg/L, respectively; adsorbent loading =

0.5 g/L, temperature = 25°C, initial pH = 7.

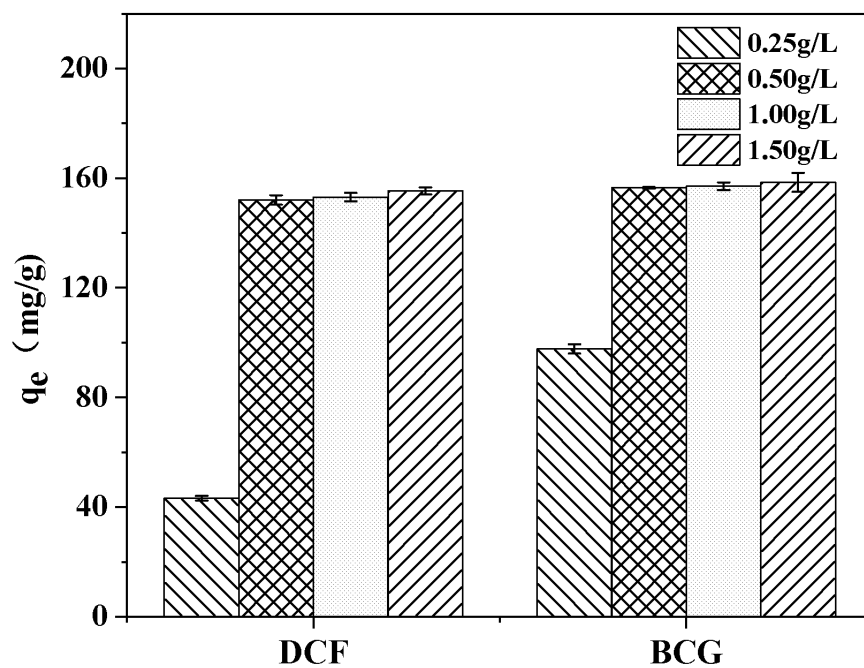

Fig. S3 Effect of adsorbent dosage on adsorption of DCF and BCG on Ni/Co-BTC MOF.

Reaction conditions: DCF and BCG concentration = 100 mg/L, respectively; temperature = 25°C,  
initial pH = 7.

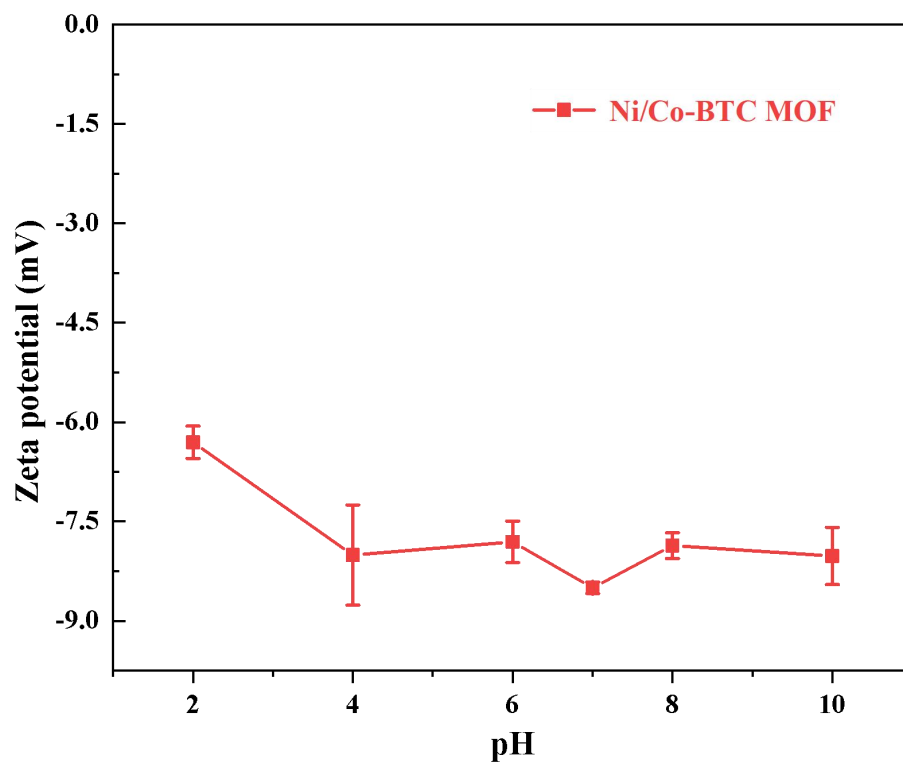

Fig. S4 The zeta potential of Ni/Co-BTC MOF at different pH.

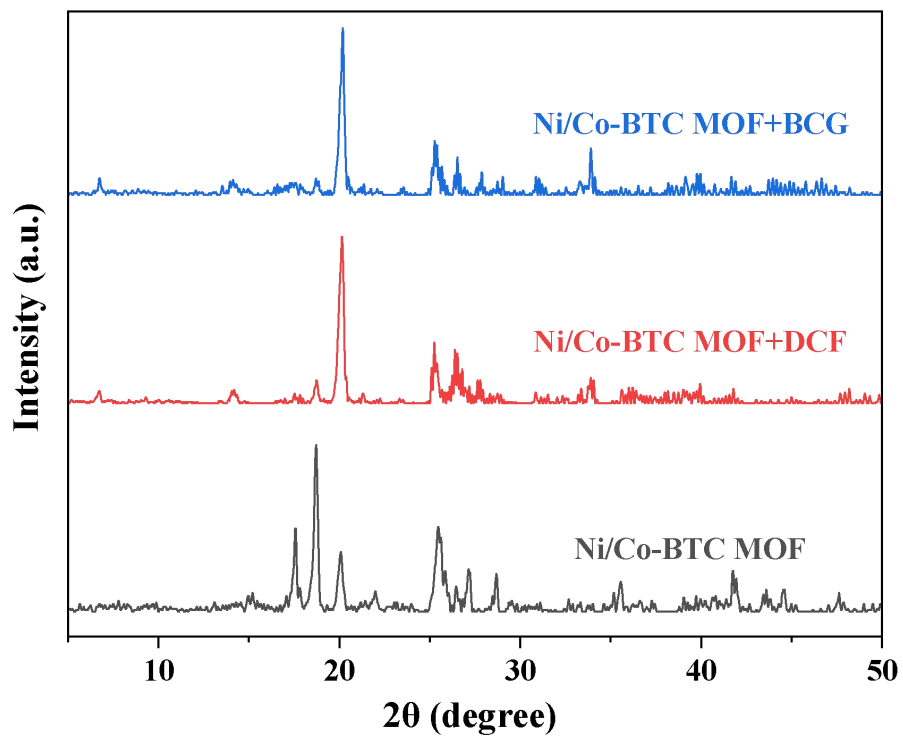

Fig. S5 XPS spectra of Ni/Co-BTC MOF before and after DCF and BCG adsorption. Reaction conditions: DCF and BCG concentration = 100mg/L, respectively; adsorbent loading = 0.5 g/L, temperature = 25°C, initial pH = 7.

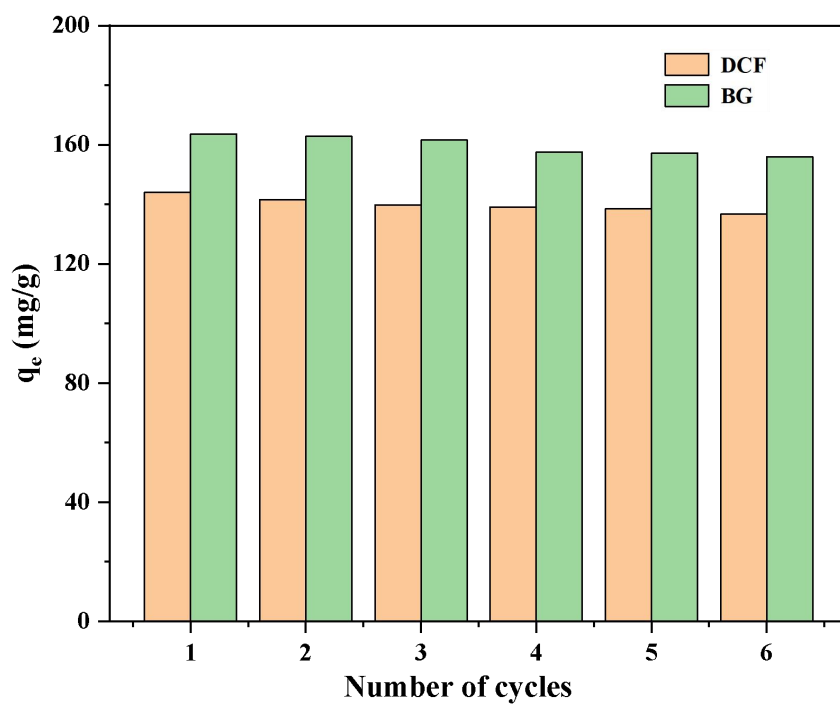

Fig. S6 Reusability of Ni/Co-BTC MOF for DCF and BCG adsorption. Reaction conditions: DCF and BCG concentration = 100mg/L, respectively; adsorbent loading = 0.5 g/L, temperature = 25°C, initial pH = 7.

Table.S1 Maximum adsorption capacities of DCF and BCG on other adsorbents

| Pollutants | Adsorbent                                                          | Maximum adsorption capabilities (mg/g) | Ref.       |
|------------|--------------------------------------------------------------------|----------------------------------------|------------|
| DCF        | Glutaraldehyde-modified silica/chitosan composites                 | 237.8                                  | 1          |
|            | Plasma-based surface functionalization of palm fibers              | 31.08                                  | 2          |
|            | Fe <sub>3</sub> O <sub>4</sub> @MOF-100 (Fe)                       | 377.36                                 | 3          |
|            | Ni <sub>0.5</sub> Zn <sub>0.5</sub> Fe <sub>2</sub> O <sub>4</sub> | 52.91                                  | 4          |
|            | Sycamore ball activated carbon                                     | 178.89                                 | 5          |
|            | Ni/Co-BTC MOF                                                      | 343.05                                 | This study |
| BCG        | Cotton stalks activated carbon                                     | 222.22                                 | 6          |
|            | Phragmites karka                                                   | 392.3                                  | 7          |
|            | ZnO-NRs-AC                                                         | 57.80                                  | 8          |
|            | Cd(OH) <sub>2</sub> -NW-AC                                         | 108.7                                  | 9          |
|            | ZIF-11                                                             | 150                                    | 10         |
|            | Poly (1,2-epoxy-3-phenoxy) propane                                 | 52.63                                  | 11         |
|            | Ni/Co-BTC MOF                                                      | 569.29                                 | This study |

### References:

- 1 T. S. Machado, L. Crestani, G. Marchezi, F. Melara, J. R. de Mello, G. L. Dotto and J. S. Piccin, *CARBOHYD POLYM*, 2022, **277**, 118868.
- 2 C. M. Darryle, E. Acayanka, B. Takam, L. N. Line, G. Y. Kamgang, S. Laminsi, L. Sellaoui and A. Bonilla-Petriciolet, *Journal of Water Process Engineering*,



- 2021, **43**, 102254.
- 3 X. Zheng, J. Wang, X. Xue, W. Liu, Y. Kong, R. Cheng and D. Yuan, *ENVIRON SCI POLLUT R*, 2018, **25**, 31705-31717.
  - 4 Z. Mohammadi, A. R. Kelishami and A. Ashrafi, *WATER SCI TECHNOL*, 2021, **83**, 1265-1277.
  - 5 T. Avcu, O. Üner and Ü. Geçgel, *Surfaces and Interfaces*, 2021, **24**, 101097.
  - 6 M. Ozdemir, O. Durmus, O. Sahin and C. Saka, *DESALIN WATER TREAT*, 2016, **57**, 18038-18048.
  - 7 B. M. Murmu, S. S. Behera, S. Das, R. K. Mohapatra, B. K. Bindhani and P. K. Parhi, *INDIAN J CHEM TECHN*, 2018, **25**, 409-420.
  - 8 F. Ansari, M. Ghaedi, M. Taghdiri and A. Asfaram, *ULTRASON SONOCHEM*, 2016, **33**, 197-209.
  - 9 M. Ghaedi, H. Khajesharifi, A. Hemmati Yadkuri, M. Roosta, R. Sahraei and A. Daneshfar, *Spectrochimica Acta Part A: Molecular and Biomolecular Spectroscopy*, 2012, **86**, 62-68.
  - 10 R. Lamari, B. Benotmane and S. Mezali, *DESALIN WATER TREAT*, 2021, **224**, 407-420.
  - 11 G. Torğut and K. Demirelli, *ARAB J SCI ENG*, 2018, **43**, 3503-3514.
